# Supplementary material
Source: Springer Nature journal article supplement (https://www.springermedizin.de/resource/supplementary/13618_2011_43_MOESM5_ESM.pdf/9681028)

## H2 inhalation

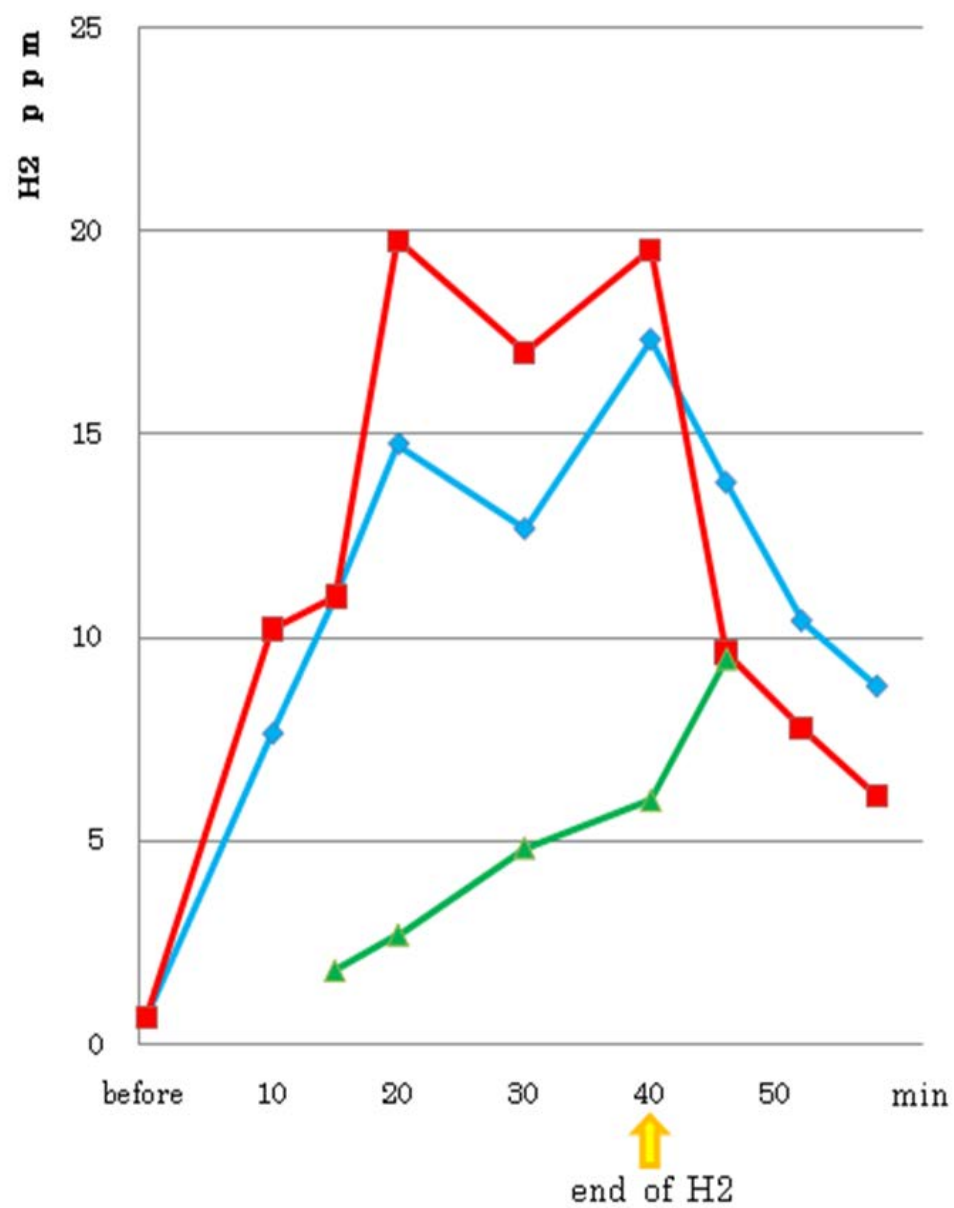

## H2 infusion

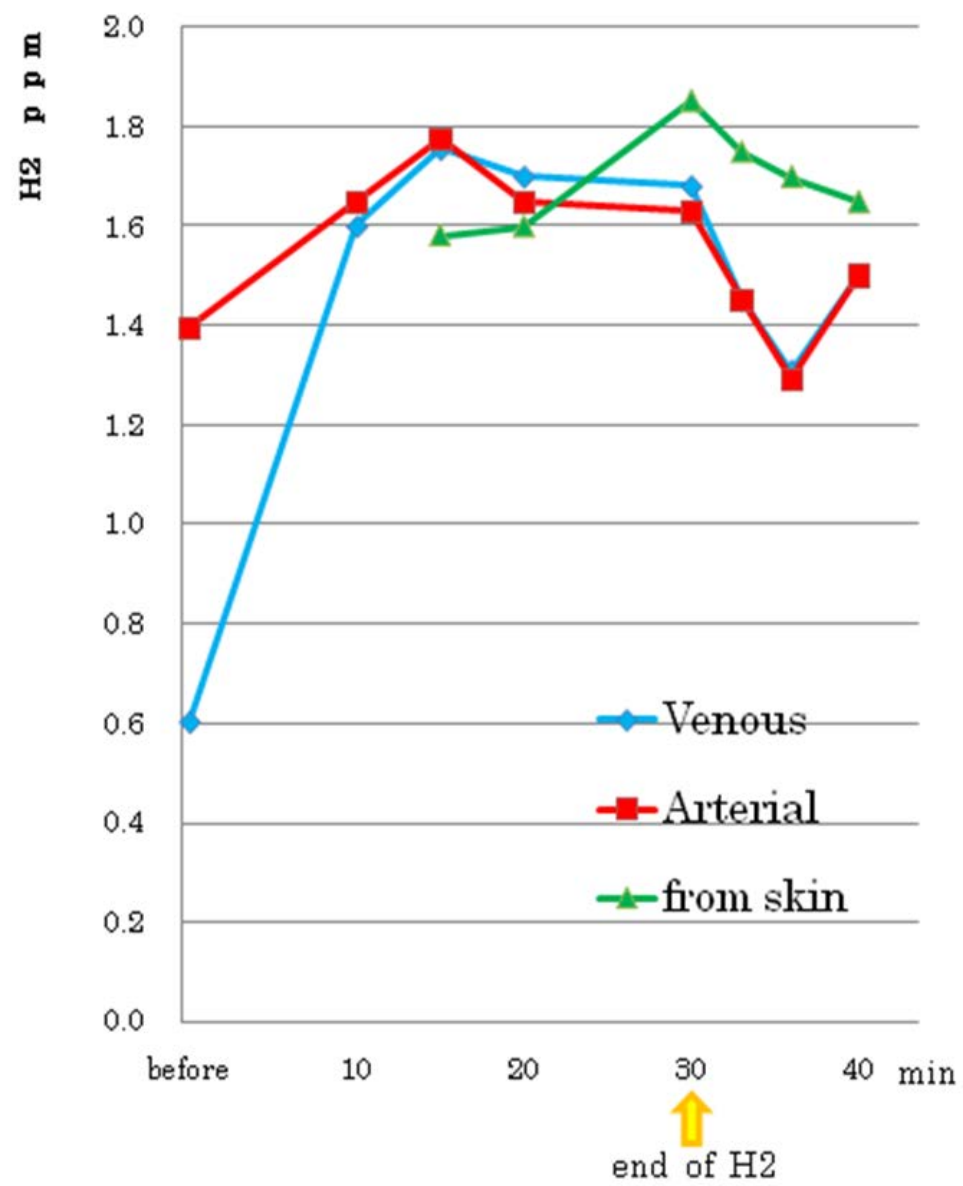

Supplement: MOESM5 [file 9681028]
